# Supplementary material for: Facile production of graphene nanosheets comprising nitrogen-doping through in situ cathodic plasma formation during electrochemical exfoliation
Source: Royal Society of Chemistry journal article supplement (doi:10.1039/c6tc03128e), 2017-01-01
Supplement: c6tc03128e1.pdf [file c6tc03128e1.pdf]

## Supporting Information for

# Facile production of graphene nanosheets comprising nitrogen-doping through in situ cathodic plasma formation during electrochemical exfoliation

Po-Jen Yen<sup>a</sup>, Chao-Chi Ting<sup>a</sup>, Yung-Chi Chiu<sup>a</sup>, Tseung-Yuen Tseng<sup>b</sup>, Yao-Jane Hsu<sup>c</sup>,  
Wen-Wei Wu<sup>a</sup>, and Kung-Hwa Wei<sup>\*a</sup>

<sup>a</sup>Department of Materials Science and Engineering, National Chiao Tung University, Hsinchu, Taiwan

<sup>b</sup>Department of Electronics Engineering, National Chiao Tung University, Hsinchu, Taiwan

<sup>c</sup>National Synchrotron Radiation Research Center, Hsinchu, Taiwan

\*Corresponding author:

E-mail: khwei@mail.nctu.edu.tw;

Fax: +886-3-5724727

Tel.: +886-3-5731771

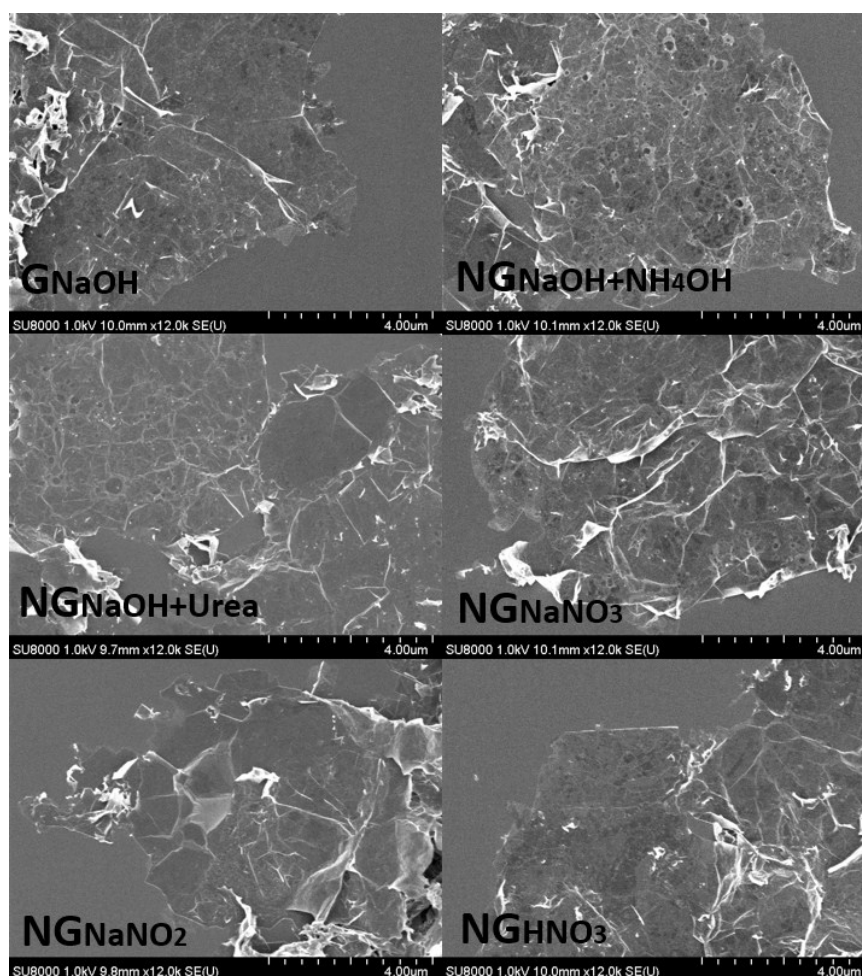

**Fig. S1.** FE-SEM images of as-produced NGs.  $G_x$  and  $NG_x$  denote graphene and nitrogen-doped graphene, respectively, with  $x$  representing the electrolyte used in each process. These images reveal that the as-made graphene nanosheets had sharp edges and folded structures after exfoliation.



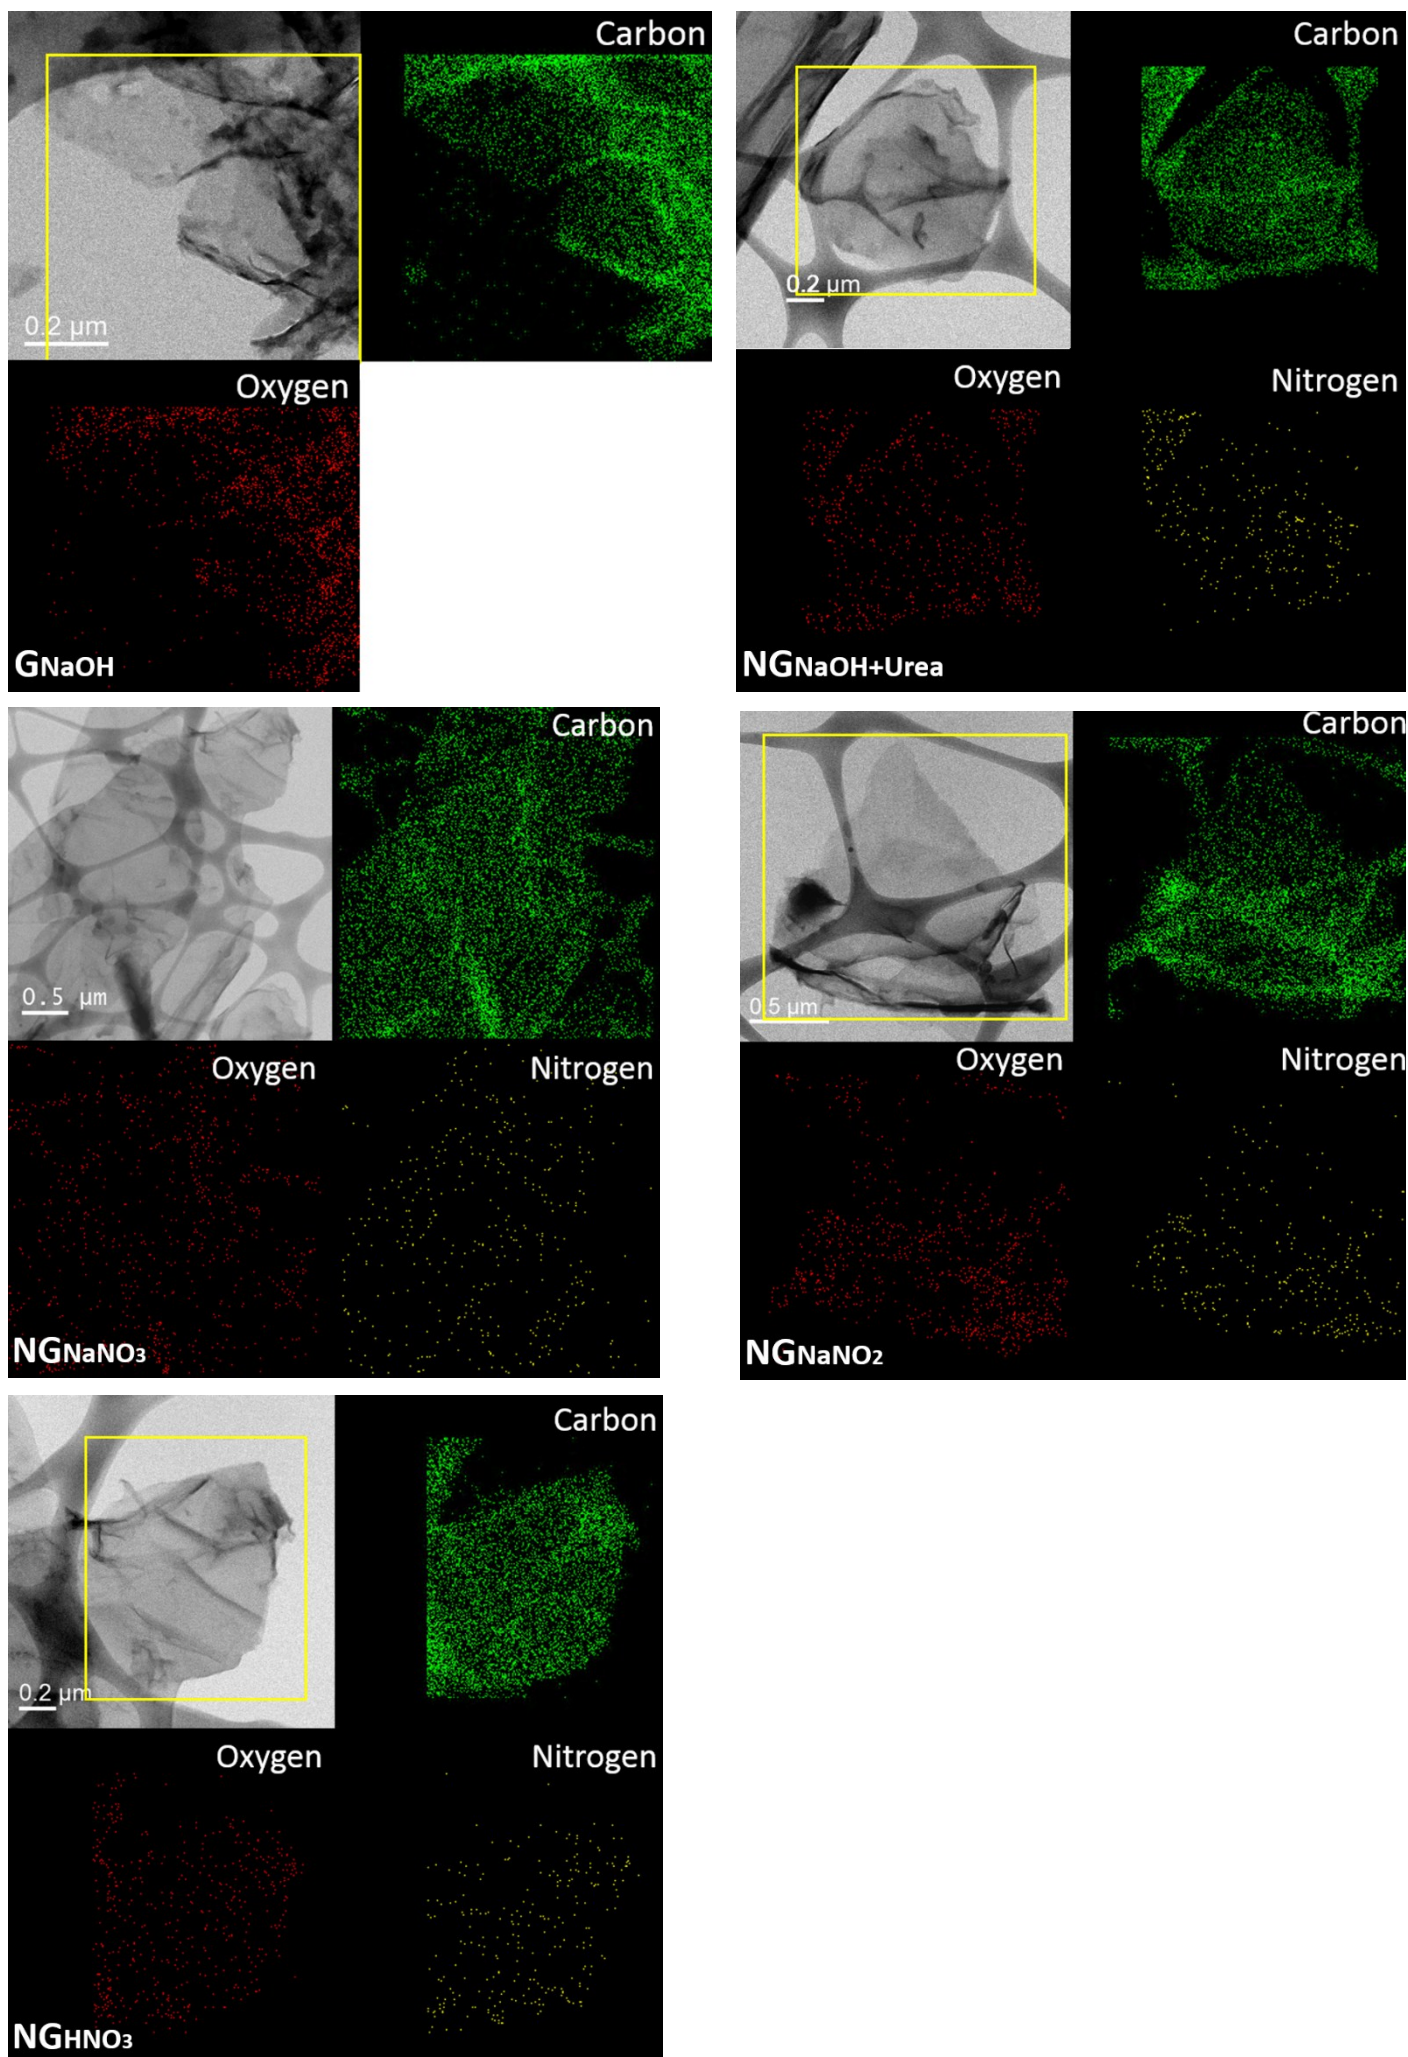

**Fig. S2.** Bright-field TEM images and EDS elemental mapping images of each NG produced through the

cathodic plasma process when using different electrolytes. The bright-field TEM images reveal that the samples remained few micrometers long and wide, with sharp edges. In addition to carbon atoms, oxygen and nitrogen atoms were both detected in the EDS elemental mapping images obtained through STEM measurements. The nitrogen atom distributions were quite normal and fitted the shapes of the chosen samples, suggesting that the cathodic plasma process did indeed dope nitrogen atoms into the graphene.

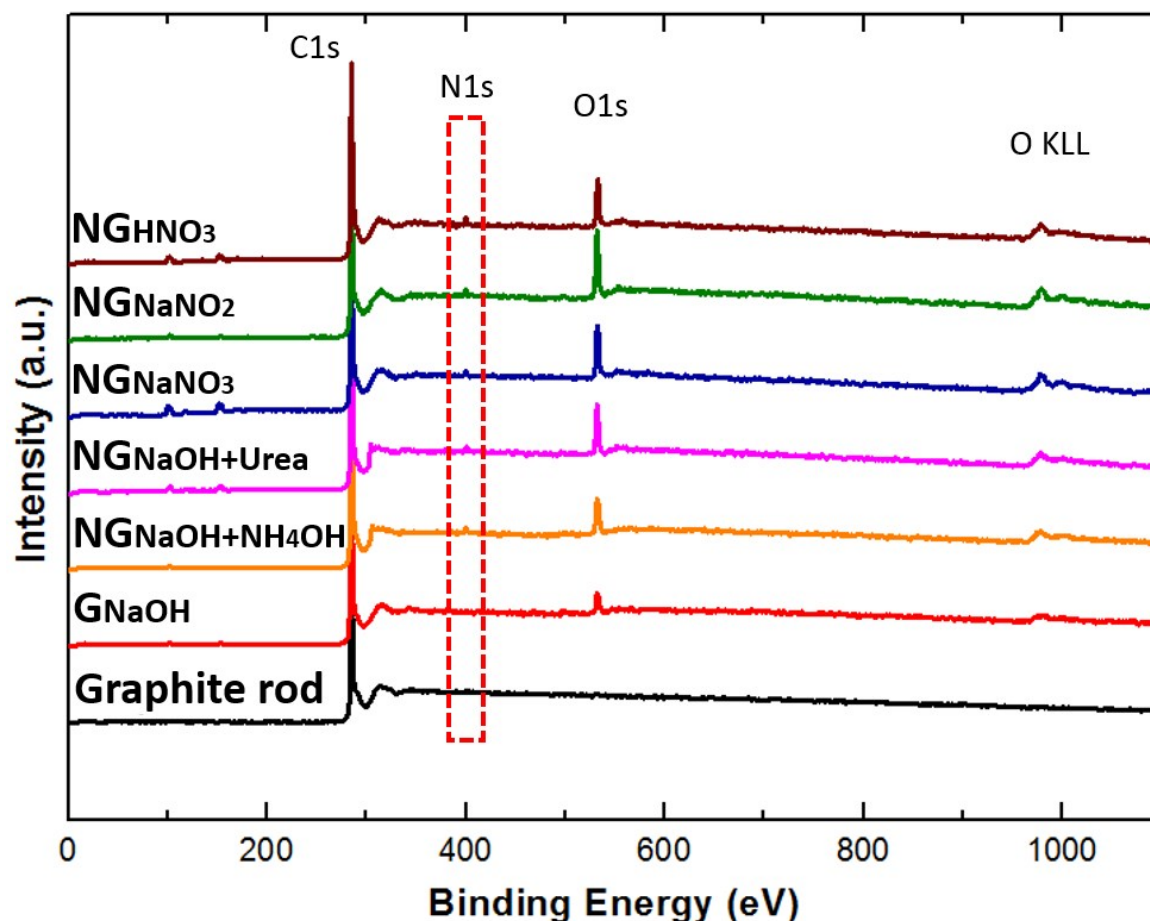

**Fig. S3.** XPS survey spectra of graphite rod and nitrogen-doped samples. In addition to successes using ammonia- and urea- containing aqueous electrolytes, nitrogen-binding signals in XPS measurements were also evident when using  $\text{NaNO}_3$ ,  $\text{NaNO}_2$ , and  $\text{HNO}_3$  as aqueous electrolytes, suggesting that nitrate and nitrite can also serve as dopants for NGs.

| materials                                      | XPS (at.%) |       |      | EA (wt%) |      |      |      |
|------------------------------------------------|------------|-------|------|----------|------|------|------|
|                                                | C          | O     | N    | C        | H    | O    | N    |
| Graphite rod                                   | 99.98      | 0.02  | –    | 99.97    | 0.01 | 0.02 | –    |
| $\text{G}_{\text{NaOH}}$                       | 95.88      | 4.12  | –    | 96.01    | 0.31 | 3.68 | –    |
| $\text{NG}_{\text{NaOH}+\text{NH}_4\text{OH}}$ | 91.07      | 8.22  | 0.71 | 90.05    | 1.23 | 8.10 | 0.62 |
| $\text{NG}_{\text{NaOH}+\text{Urea}}$          | 88.39      | 11.01 | 0.60 | 91.86    | 1.01 | 6.59 | 0.54 |
| $\text{NG}_{\text{NaNO}_3}$                    | 88.84      | 10.47 | 0.69 | 89.98    | 1.13 | 8.39 | 0.50 |
| $\text{NG}_{\text{NaNO}_2}$                    | 88.13      | 11.20 | 0.67 | 89.81    | 1.13 | 8.58 | 0.48 |
| $\text{NG}_{\text{HNO}_3}$                     | 89.49      | 9.70  | 0.81 | 90.49    | 1.05 | 7.74 | 0.72 |

**Table S1.** Surface and bulk elemental compositions of graphite rod and NG samples prepared using various electrolytes.

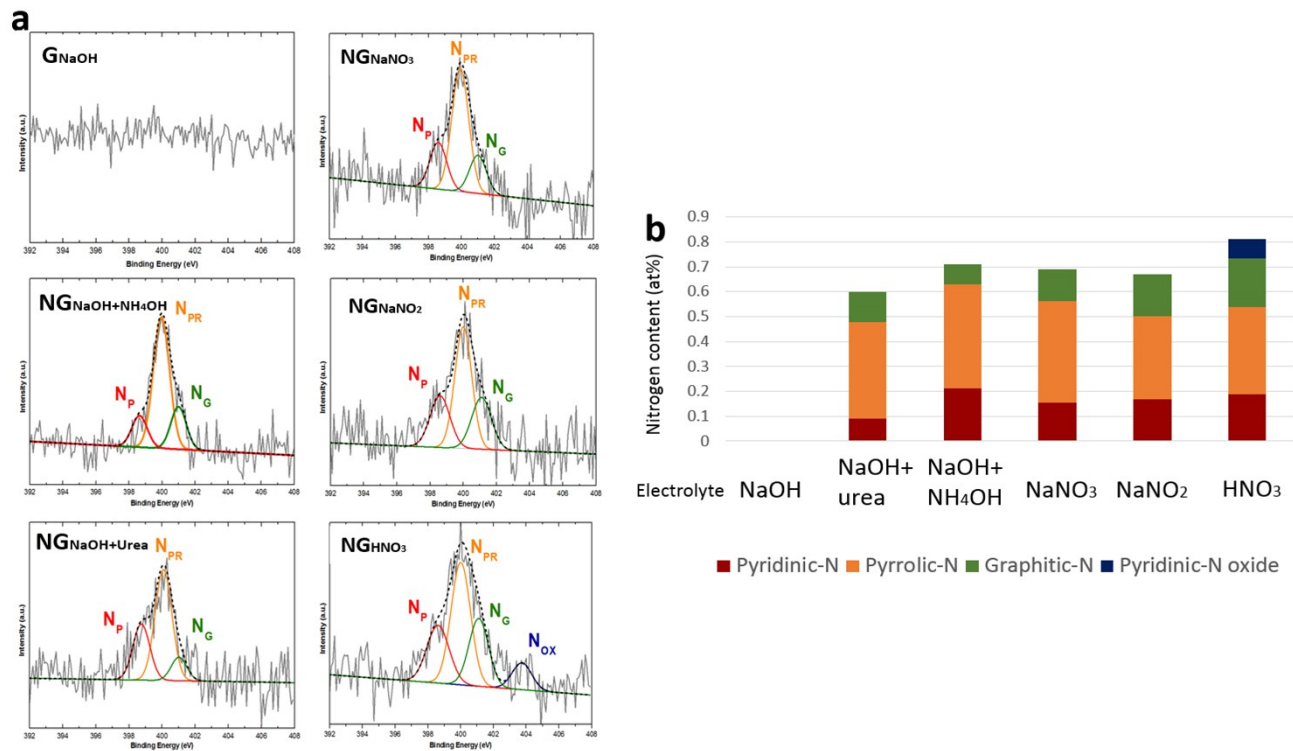

**Fig. S4.** (a) High-resolution N 1s XPS spectra with deconvoluted peak assignments and (b) contents of various nitrogen-bonding states for samples produced using various electrolytes. The N 1s spectra of the graphene samples doped using the various electrolytes were all deconvoluted by three Gaussian fittings. Interestingly, for  $\text{NG}_{\text{HNO}_3}$  a signal for pyridinic-N oxide was detected at 403.8 eV, possibly because of the stronger oxidizing ability of  $\text{HNO}_3$ .

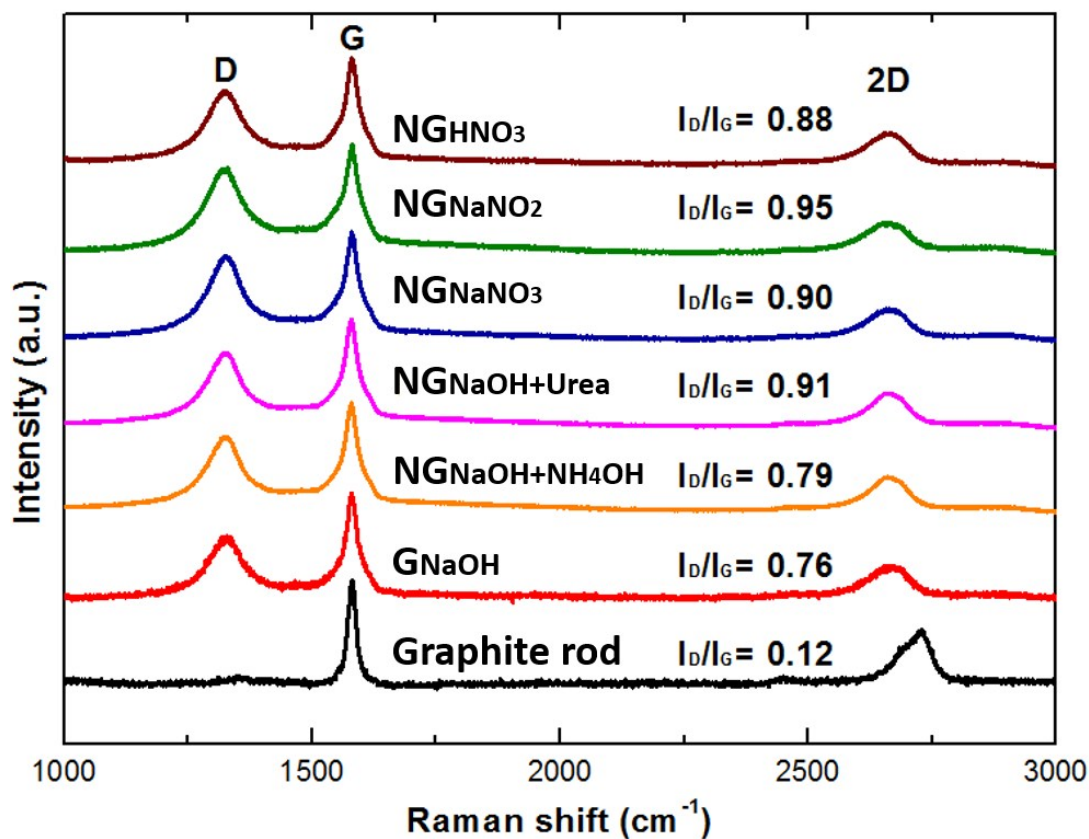

**Fig. S5.** Raman spectra revealing the D-, G-, and 2D-bands and  $I_D/I_G$  ratios of graphite rod and NG samples produced using various electrolytes. After the cathodic plasma process, the defect level in each sample increased dramatically upon decreasing the number of graphene layers.

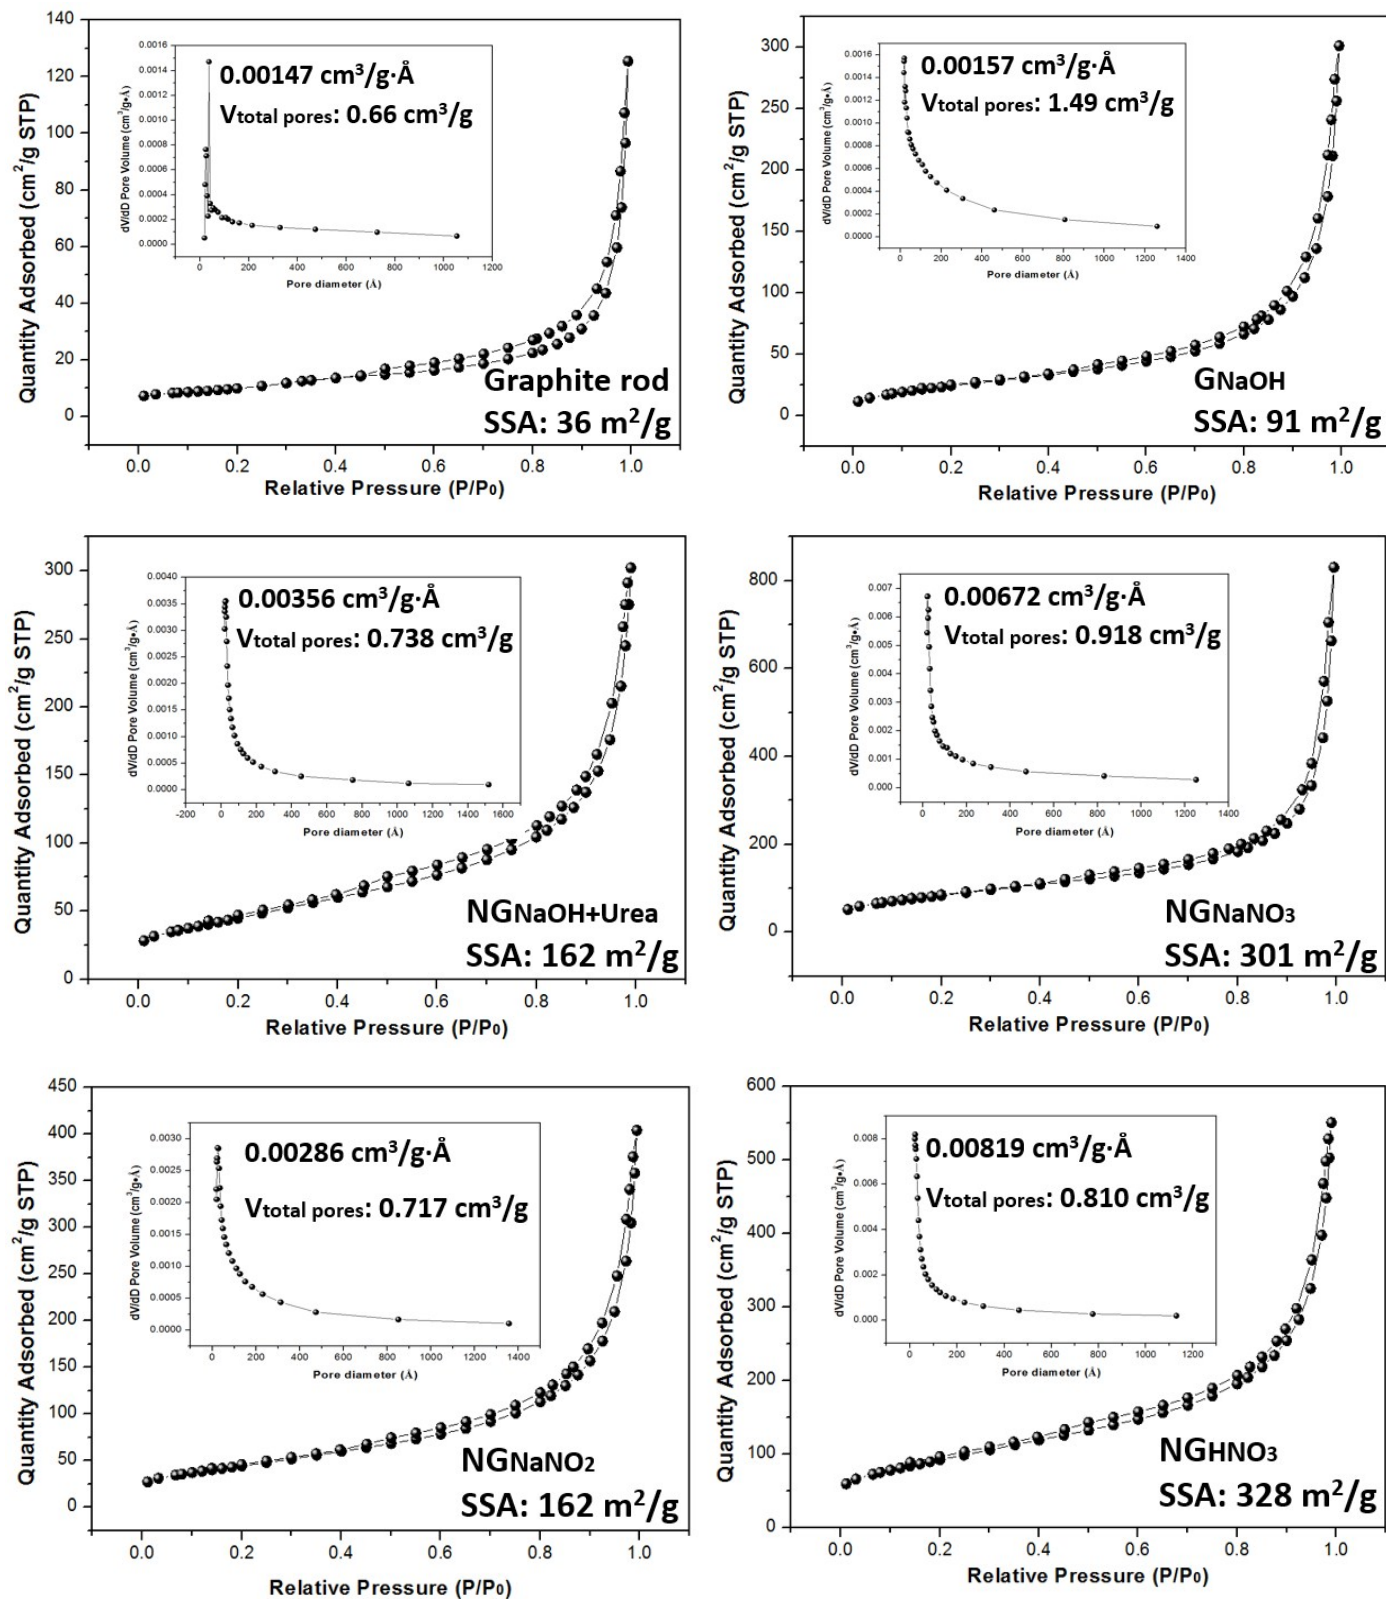

**Fig. S6.** Nitrogen adsorption/desorption curves for measurement of BET surface areas; insets: BJH pore size distributions of the graphite rod and the samples prepared through nitrogen-doping. The specific surface areas of the NGs could be tuned by varying the electrolyte.

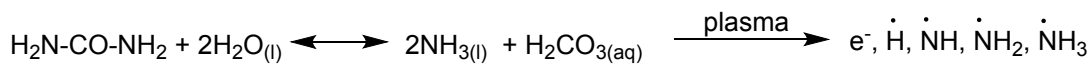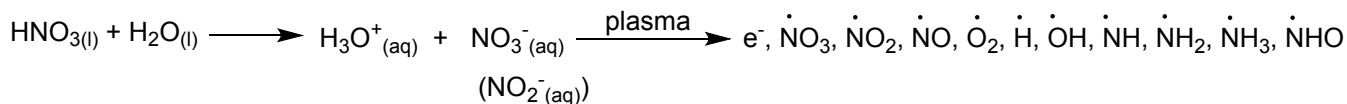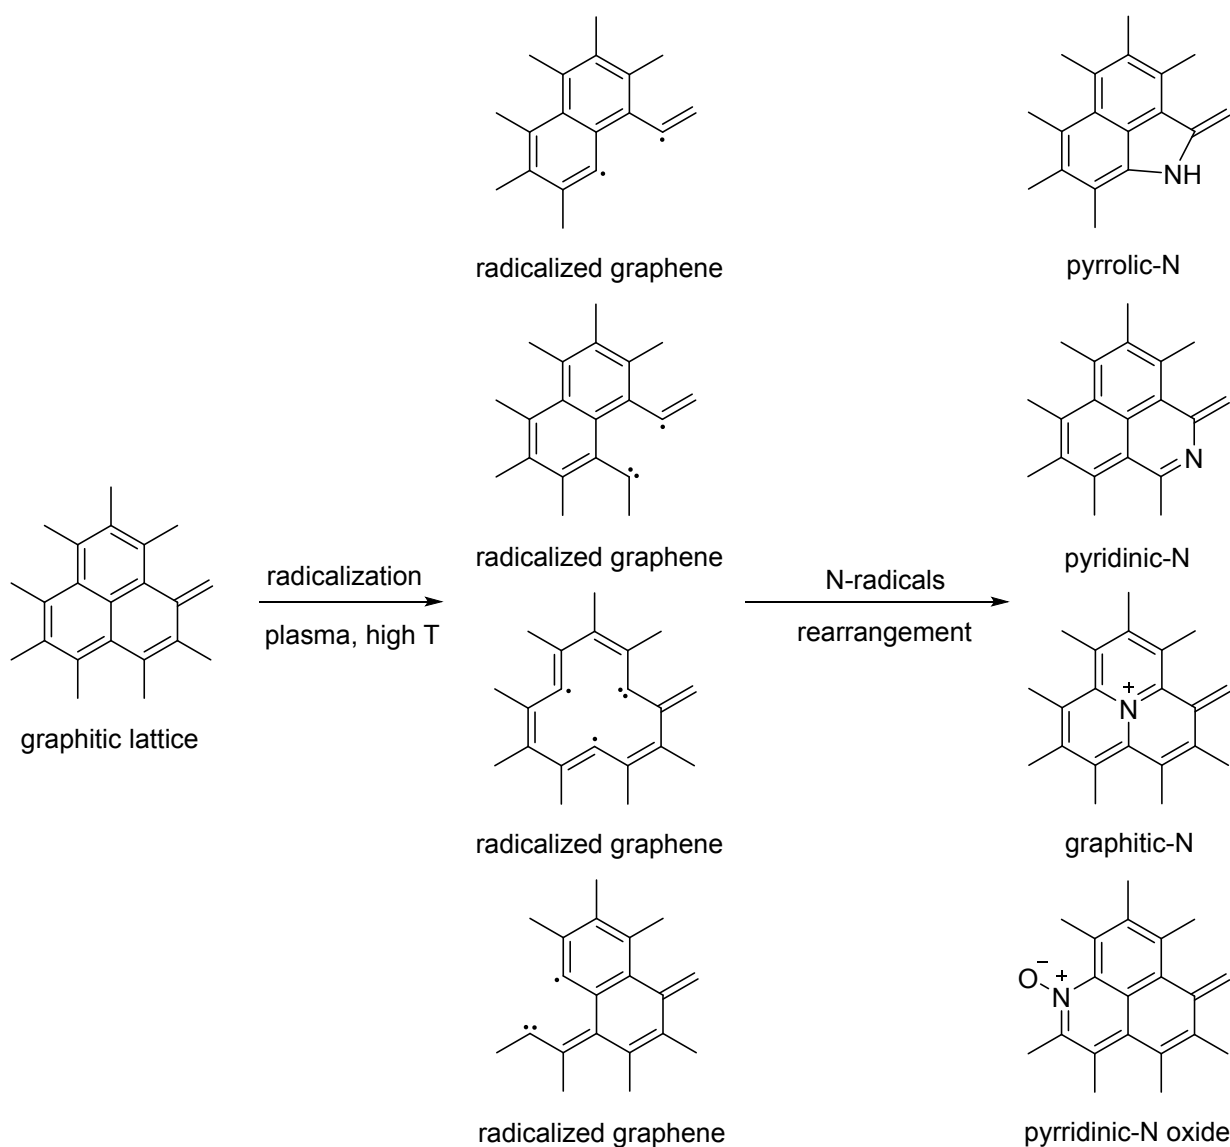

**Scheme S1.** When urea dissolves into water, radicalized ammonia molecules can be generated which serve as the precursor of nitrogen containing radicals<sup>1</sup> such as  $\text{NH}_3^\bullet$ ,  $\text{NH}_2^\bullet$ ,  $\text{NH}^\bullet$ . After reacting with radicalized graphene and experiencing structural rearrangement<sup>2</sup>, nitrogen-doped graphene with pyrrolic, pyridinic and graphitic bonding configuration of nitrogen atom was produced. On the other hand, when we use nitric acid or sodium nitrate/nitride as electrolyte, nitrogen-doped graphene can also be produced through cathodic plasma electrolysis. Here we propose a possible mechanism of nitrogen-doping process for the use of nitrate or nitrite anion as nitrogen-containing resources. When nitrate/nitrite anion experience cathodic plasma, relatively high temperature and electrical discharge can break N-O bonds<sup>3</sup> and produce radicals such as  $\text{NO}_2^\bullet$ ,  $\text{NO}^\bullet$  which possibly react with  $\text{H}^\bullet$  or  $\text{OH}^\bullet$  to form  $\text{NH}_3^\bullet$ ,  $\text{NH}_2^\bullet$ ,  $\text{NH}^\bullet$  or  $\text{NHO}^\bullet$  radicals that produce nitrogen-doped graphene in the same way. Due to the stronger oxidation ability of nitric acid, a small portion of pyridinic-N oxide was detected via XPS measurement.

## References

- 1 A. Allagui, N. Brazeau, H. Alawadhi, F. Al-momani and E. A. Baranova, *Plasma Process. Polym.*, 2015, **12**, 25–31.
- 2 G. Wang, L.-T. Jia, Y. Zhu, B. Hou, D.-B. Li and Y.-H. Sun, *RSC Adv.*, 2012, **2**, 11249-11252.
- 3 A. J. Elliott and A. S. Simsons, *Can. J. Chem.*, 1984, **62**, 1831–1834.
